# Supplementary material for: On latches in biological systems: a comparative morphological and functional study of the retinaculum and the dens lock in Collembola
Source: PubMed Central journal article supplement (PMC10169344; doi:10.1186/s12983-023-00491-2), 2023-05-09

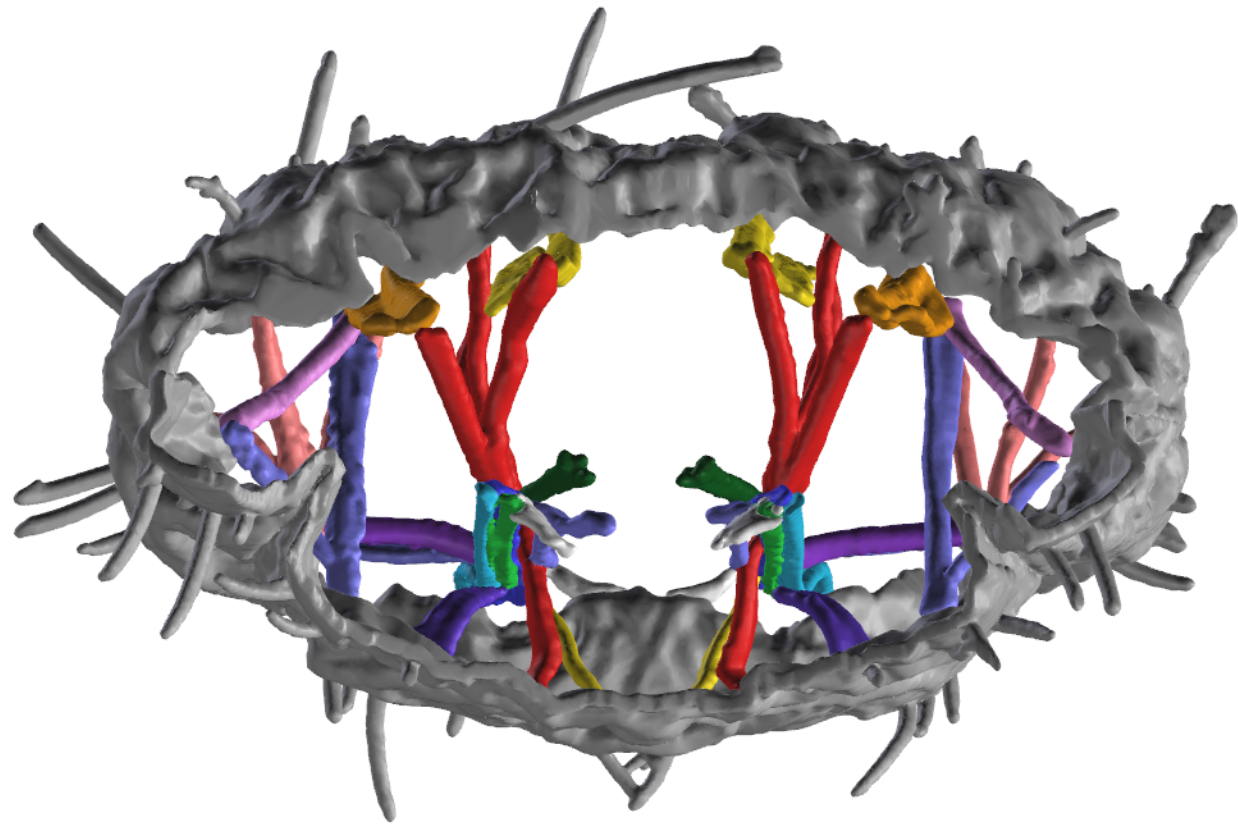

Supplement: 12983_2023_491_MOESM1_ESM.pdf [file 12983_2023_491_MOESM1_ESM.pdf]
